# Supplementary material
Source: Research Square preprint supplement (doi:10.21203/rs.3.rs-9954204/v1)
Supplement: Supplementary file 1 [file 5324f961844278875979624f.pdf]

**Supplementary information**

***Biodiversity-forest structural diversity relationships differ among taxa***

Brandon Alveshere, Lesley Bulluck, Elizabeth LaRue, Keith Krause, and Christopher Gough

**Supplementary Table 1 | National Ecological Observatory Network (NEON) study site characteristics and sampling years.** MAT–mean annual temperature, MAP–mean annual precipitation, FSD–forest structural diversity.

| Site ID | Site Name                                    | Latitude | Longitude | MAT (C) | MAP (mm) | Forest Type | Mammals | Birds | Beetles | Plants | FSD  |
|---------|----------------------------------------------|----------|-----------|---------|----------|-------------|---------|-------|---------|--------|------|
| BART    | Bartlett Experimental Forest NEON            | 44.06389 | -71.2874  | 6.2     | 1325     | DBF         | 2019    | 2019  | NA      | 2019   | 2019 |
| BONA    | Caribou-Poker Creeks Research Watershed NEON | 65.15401 | -147.503  | -3      | 262      | ENF         | 2021    | 2021  | NA      | NA     | 2021 |
| DEJU    | Delta Junction NEON                          | 63.88112 | -145.751  | -3      | 305      | ENF         | NA      | 2021  | NA      | NA     | 2021 |
| DELA    | Dead Lake NEON                               | 32.54173 | -87.8039  | 17.6    | 1372     | MF          | NA      | NA    | 2021    | 2021   | 2021 |
| GRSM    | Great Smoky Mountains National Park NEON     | 35.68896 | -83.502   | 13.1    | 1375     | DBF         | NA      | NA    | 2018    | 2018   | 2018 |
| GUAN    | Guanica Forest NEON                          | 17.96955 | -66.8687  | 23      | 840      | EBF         | NA      | 2018  | NA      | 2018   | 2018 |
| HARV    | Harvard Forest & Quabbin Watershed NEON      | 42.53691 | -72.1727  | 7.4     | 1199     | DBF         | 2019    | 2019  | 2019    | 2019   | 2019 |
| JERC    | The Jones Center At Ichauway NEON            | 31.19484 | -84.4686  | 19.2    | 1308     | ENF         | 2021    | 2021  | 2020    | NA     | 2021 |
| LENO    | Lenoir Landing NEON                          | 31.85386 | -88.1612  | 18.1    | 1386     | DBF         | NA      | NA    | 2021    | NA     | 2021 |
| MLBS    | Mountain Lake Biological Station NEON        | 37.37831 | -80.5248  | 8.8     | 1227     | DBF         | NA      | 2021  | 2021    | NA     | 2021 |
| OSBS    | Ordway-Swisher                               | 29.68928 | -81.9934  | 20.9    | 1302     | ENF         | 2021    | 2021  | 2020    | 2021   | 2021 |

|      |                                                             |          |          |      |      |     |      |      |      |      |      |
|------|-------------------------------------------------------------|----------|----------|------|------|-----|------|------|------|------|------|
|      | Biological Station NEON                                     |          |          |      |      |     |      |      |      |      |      |
| PUUM | Pu'u Maka'ala Natural Area Reserve NEON                     | 19.55309 | -155.317 | 12.7 | 2657 | EBF | NA   | NA   | 2019 | 2019 | 2019 |
| RMNP | Rocky Mountains NEON                                        | 40.2759  | -105.546 | 2.9  | 731  | ENF | 2020 | NA   | 2020 | 2020 | 2020 |
| SCBI | Smithsonian Conservation Biology Institute NEON             | 38.89293 | -78.1395 | 11.6 | 1126 | DBF | NA   | NA   | NA   | 2021 | 2021 |
| SERC | Smithsonian Environmental Research Center NEON              | 38.89013 | -76.56   | 13.6 | 1075 | DBF | 2021 | NA   | 2021 | 2021 | 2021 |
| SOAP | Soaproot Saddle NEON                                        | 37.03337 | -119.262 | 13.4 | 900  | ENF | NA   | NA   | 2019 | NA   | 2021 |
| STEI | Steigerwaldt-Chequamegon NEON                               | 45.50894 | -89.5864 | 4.8  | 797  | DBF | NA   | 2020 | NA   | NA   | 2020 |
| TALL | Talladega National Forest NEON                              | 32.95047 | -87.3933 | 17.2 | 1383 | ENF | 2021 | 2021 | 2021 | 2020 | 2021 |
| TEAK | Lower Teakettle NEON                                        | 37.00583 | -119.006 | 8    | 1223 | ENF | NA   | 2021 | NA   | NA   | 2021 |
| UKFS | University of Kansas Field Station NEON                     | 39.04043 | -95.1922 | 12.7 | 990  | DBF | NA   | NA   | 2020 | NA   | 2020 |
| UNDE | University of Notre Dame Environmental Research Center NEON | 46.23391 | -89.5373 | 4.3  | 802  | MF  | 2020 | 2020 | 2020 | NA   | 2020 |
| WREF | Wind River Experimental Forest NEON                         | 45.82049 | -121.952 | 9.2  | 2225 | ENF | 2021 | 2021 | 2021 | 2021 | 2021 |

**Supplementary Table 2 | Summary of sample sizes and area sampled for each taxon.** Values in parentheses indicate the maximum number of units available before subsampling — for column 3, these values reflect the site with the most plots, which we used to determine sample size in order to ensure that  $\geq$  half of the plots at each site were included in estimates of taxonomic diversity.

| Taxon             | No. Sites | No. Plots Site <sup>-1</sup> | Area Sampled Plot <sup>-1</sup> | Total Area Sampled Site <sup>-1</sup> |
|-------------------|-----------|------------------------------|---------------------------------|---------------------------------------|
| Understory plants | 12 (25)   | 17 (33)                      | 6–8 1 m <sup>2</sup> subplots   | 102–136 m <sup>2</sup>                |
| Trees             | 12/15*    | 17/6*                        | 400 m <sup>2</sup>              | 6,800/2,400 m <sup>2</sup>            |
| Beetles           | 15 (20)   | 6 (11)                       | 1600 m <sup>2</sup>             | 9,600 m <sup>2</sup>                  |
| Birds             | 13 (13)   | 6 (10)                       | 250,000 m <sup>2</sup>          | 1.5 km <sup>2</sup>                   |
| Mammals           | 10 (11)   | 5 (8)                        | 8100 m <sup>2</sup>             | 40,500 m <sup>2</sup>                 |

\*Number of sites and plots sampled for trees reflects the number sampled for understory plants and beetles, respectively.

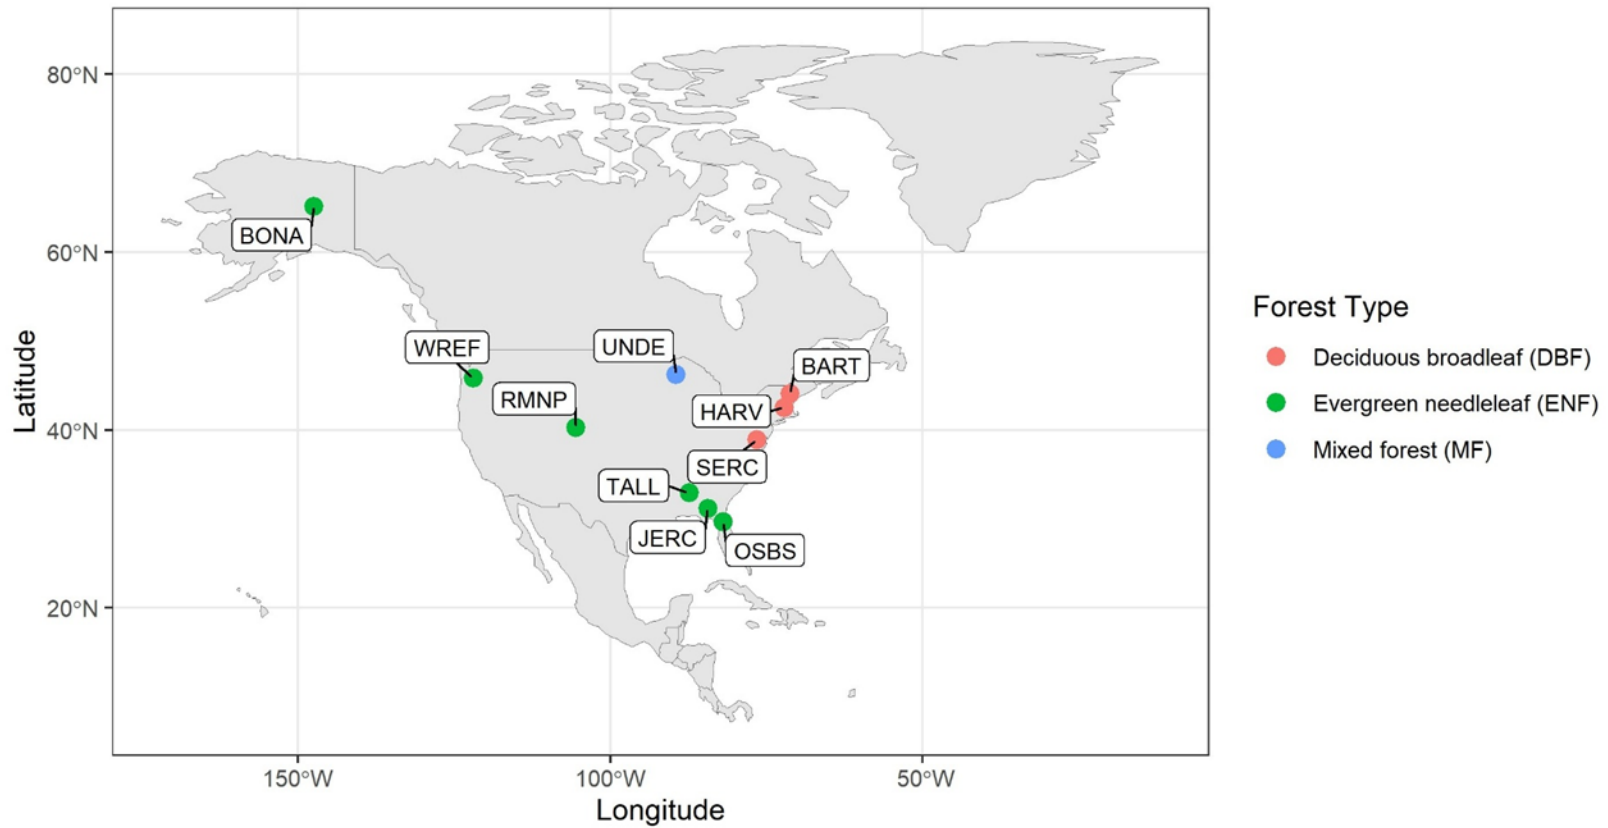

**Supplementary Fig. 1 | Map of National Ecological Observatory Network (NEON) study sites used to assess relationships between small mammal diversity and forest structural diversity. See Supplementary Table 1 for site descriptions.**

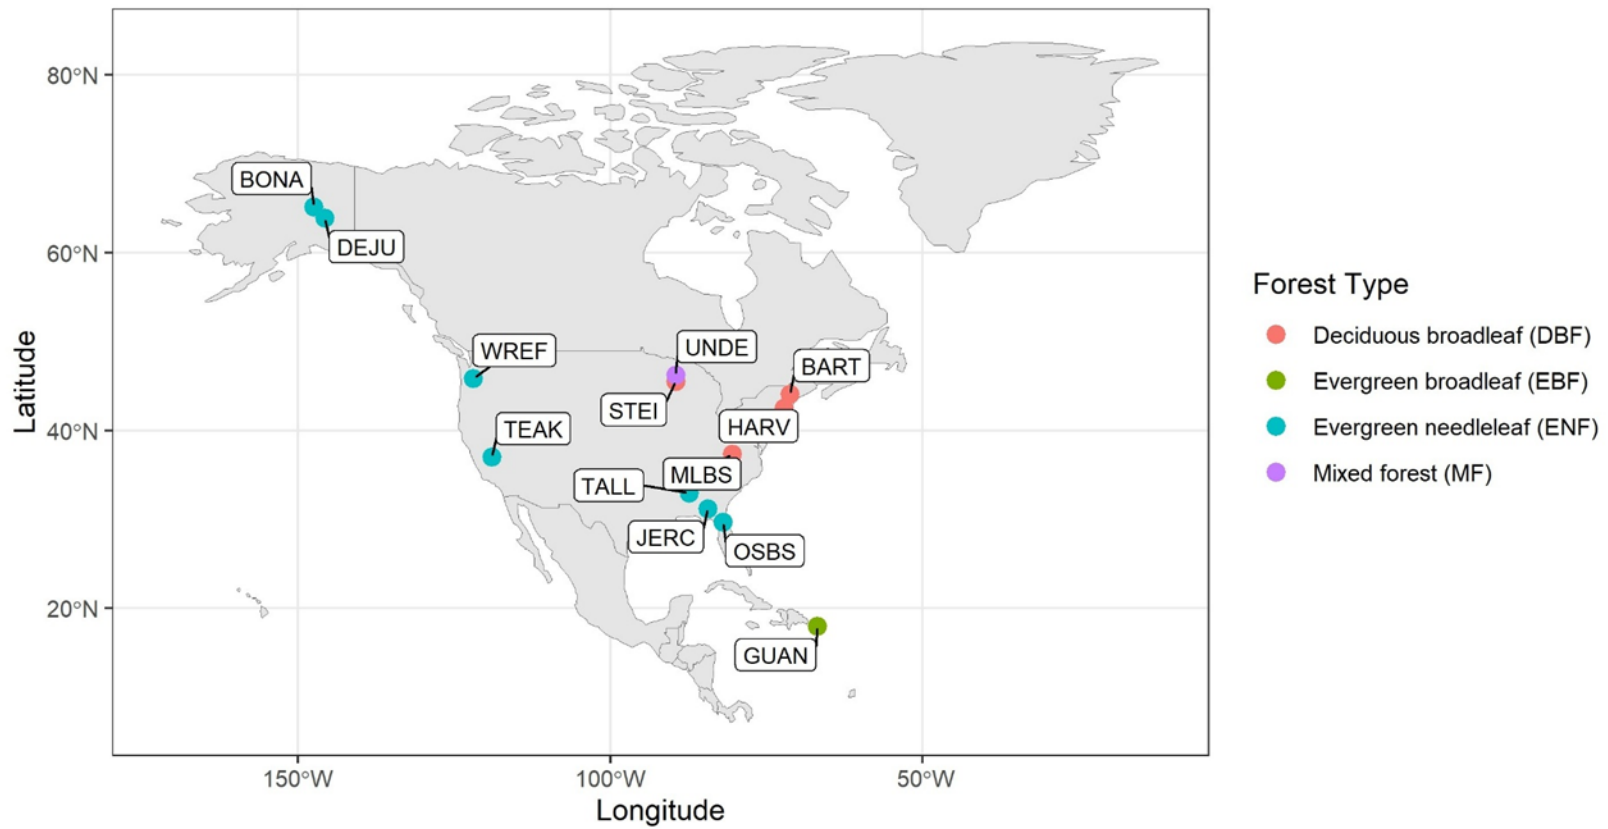

**Supplementary Fig. 2 | Map of National Ecological Observatory Network (NEON) study sites used to assess relationships between bird diversity and forest structural diversity. See Supplementary Table 1 for site descriptions.**

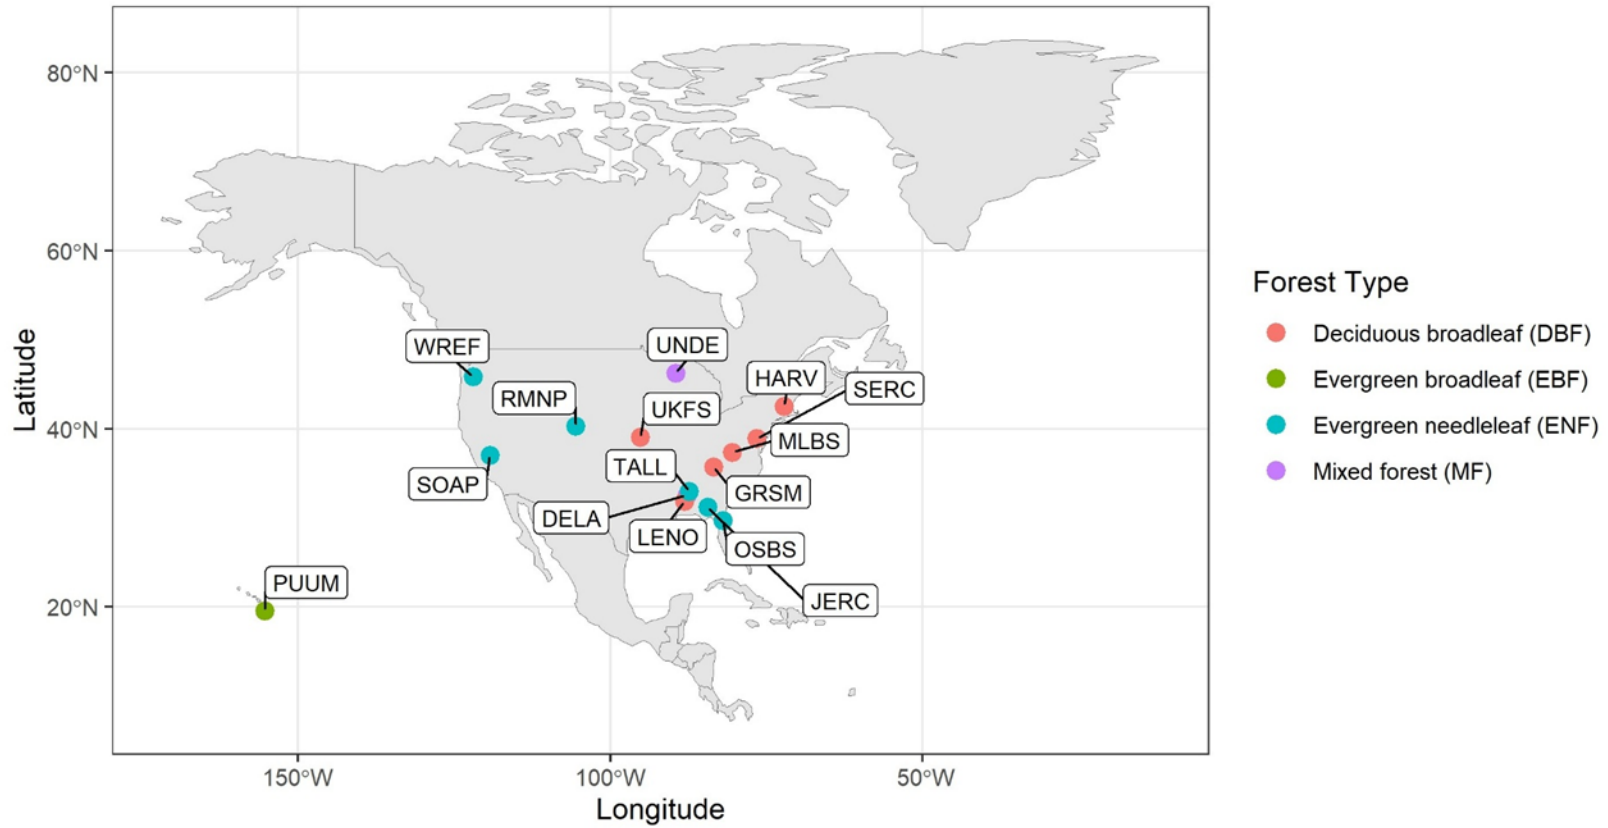

**Supplementary Fig. 3 | Map of National Ecological Observatory Network (NEON) study sites used to assess how ground beetle diversity relates to tree species diversity and forest structural diversity. See Supplementary Table 1 for site descriptions.**

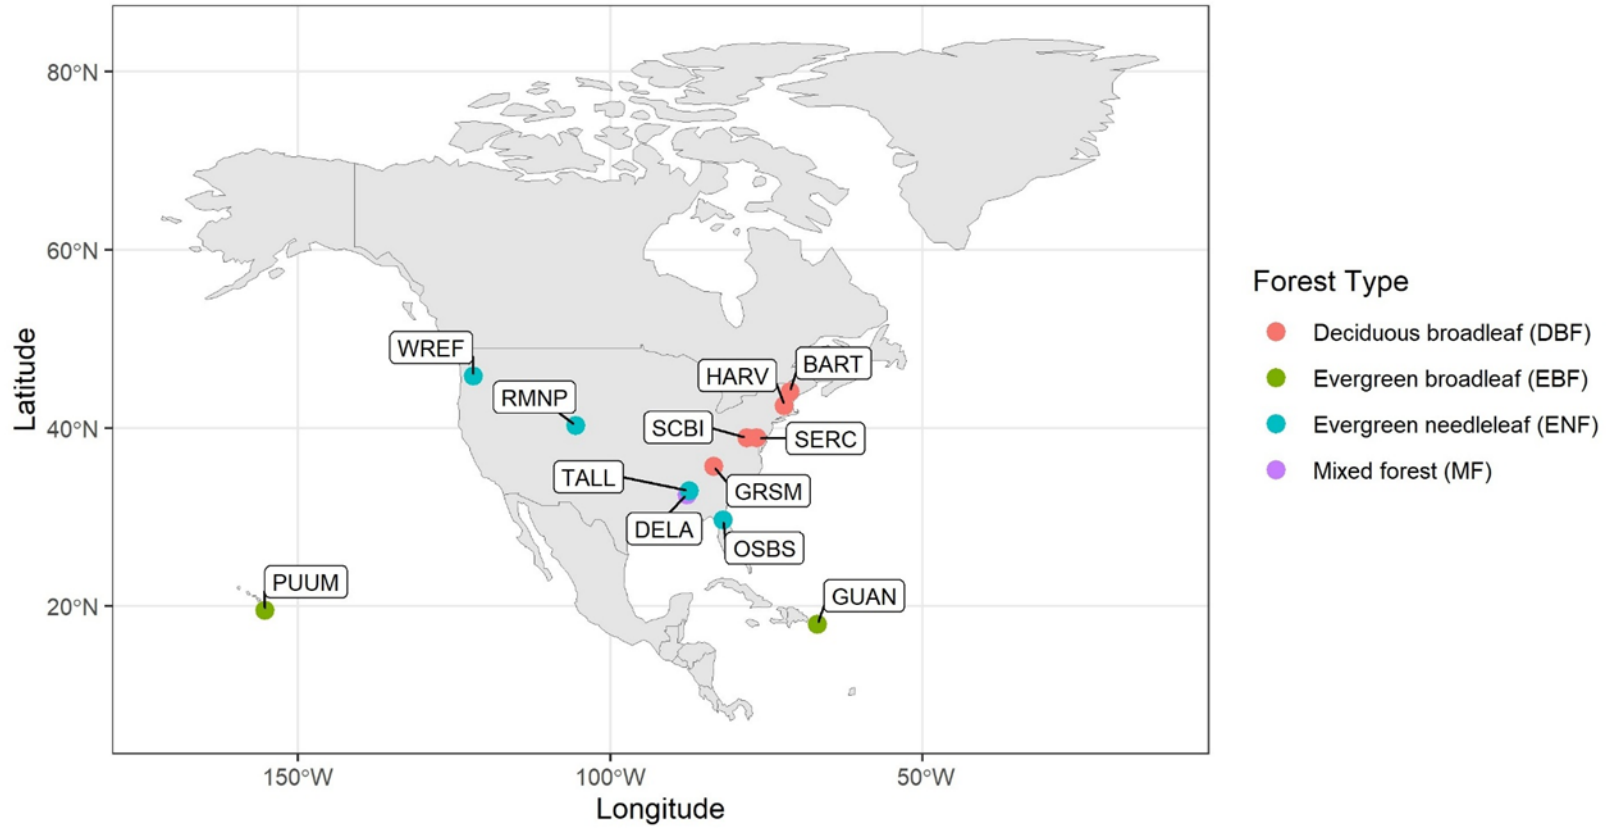

**Supplementary Fig. 4 | Map of National Ecological Observatory Network (NEON) study sites used to assess how understory plant diversity relates to tree species diversity and forest structural diversity.** See Supplementary Table 1 for site descriptions.

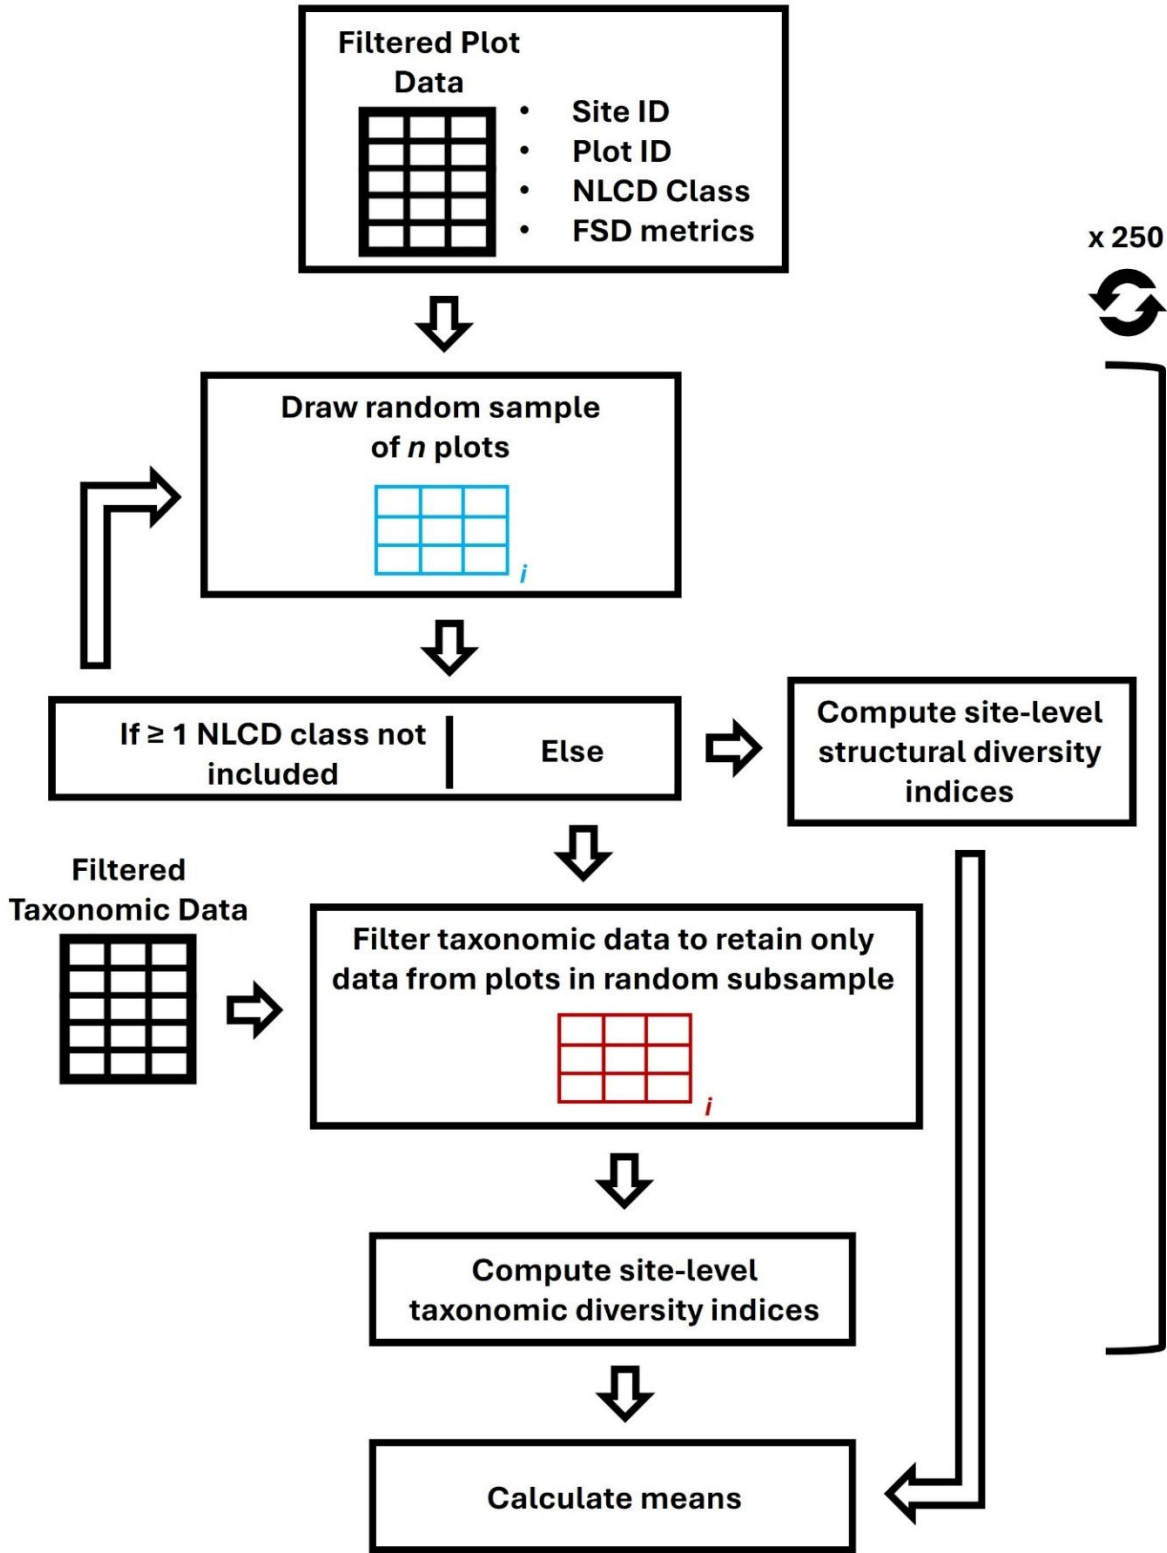

**Supplementary Fig. 5 | Iterative random sampling approach used in calculation of diversity indices.** Abbreviations: FSD–forest structural diversity, NLCD–National Land Cover Database.

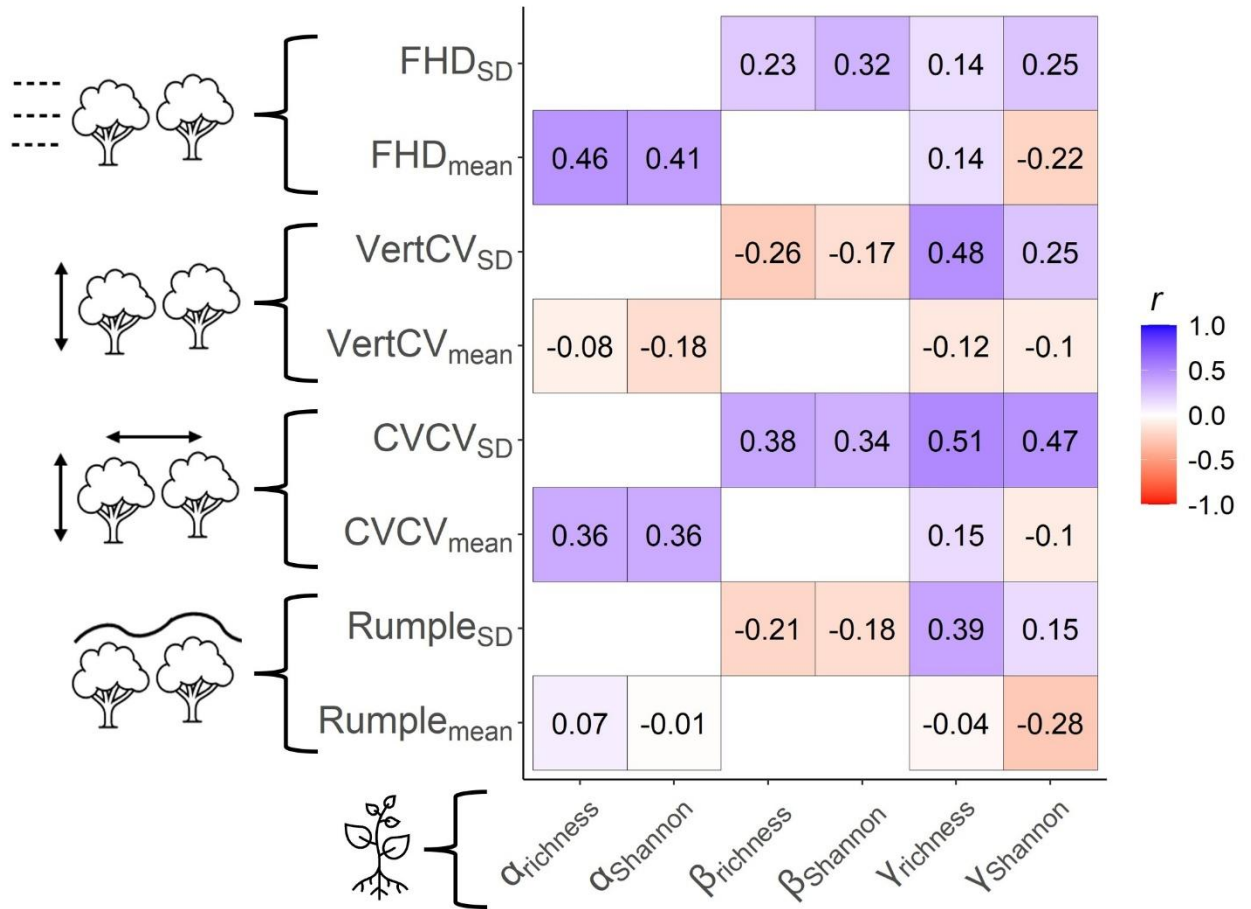

**Supplementary Fig. 6 | Pearson correlations between site-level structural diversity and understory plant taxonomic diversity indices.** Non-significant correlations ( $p > 0.05$ ) are shown in plain text, while blank cells indicate that no comparison was made.
